# Supplementary material for: Tailoring the magnetic properties of nickel nanoshells through controlled chemical growth
Source: Royal Society of Chemistry journal article supplement (doi:10.1039/c0jm01107j), 2010-01-01
Supplement: c0jm01107j.pdf [file c0jm01107j.pdf]

# Tailoring the Magnetic Properties of Nickel Nanoshells through Controlled Chemical Growth

Marcos Sanles-Sobrido,<sup>a</sup> Manuel Bañobre-López,<sup>b</sup> Veronica Salgueirino,<sup>c\*</sup> Miguel A. Correa-Duarte,<sup>a\*</sup> Benito Rodríguez-González,<sup>a</sup> José Rivas<sup>b</sup> and Luis M. Liz-Marzán<sup>a</sup>

*Received (in XXX, XXX) Xth XXXXXXXXXX 200X, Accepted Xth XXXXXXXXXX 200X*

*First published on the web Xth XXXXXXXXXX 200X*

DOI: 10.1039/b000000x

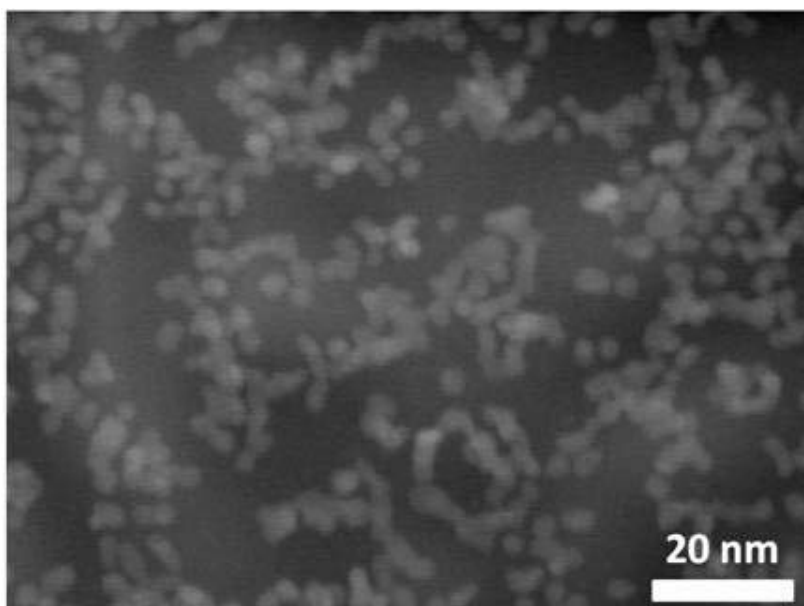

10

**Figure S1.** STEM image of the Pt nanoparticles deposited onto the surface of the colloidal PS beads.

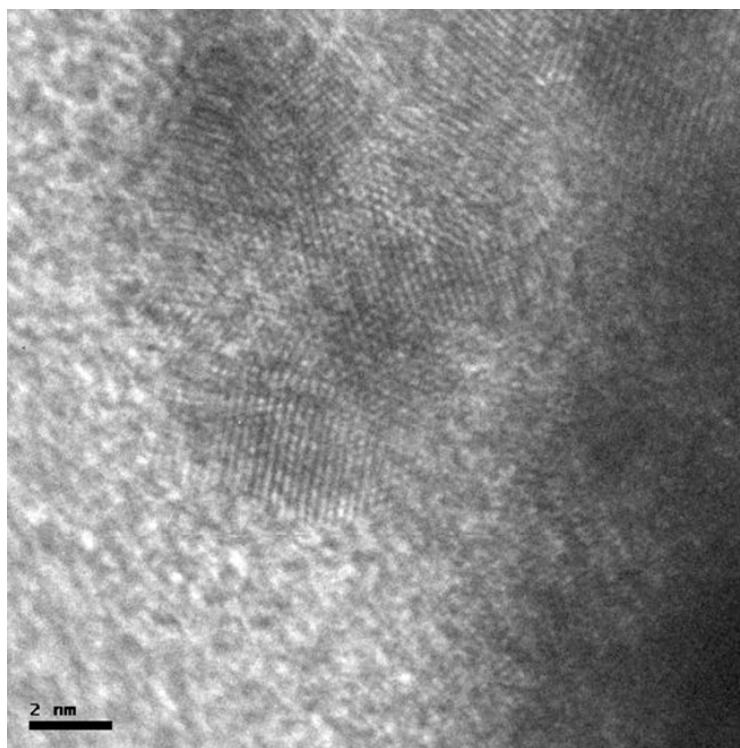

**Figure S2.** HRTEM image showing the polycrystalline nature of the Ni deposited onto the PS/Pt particles.

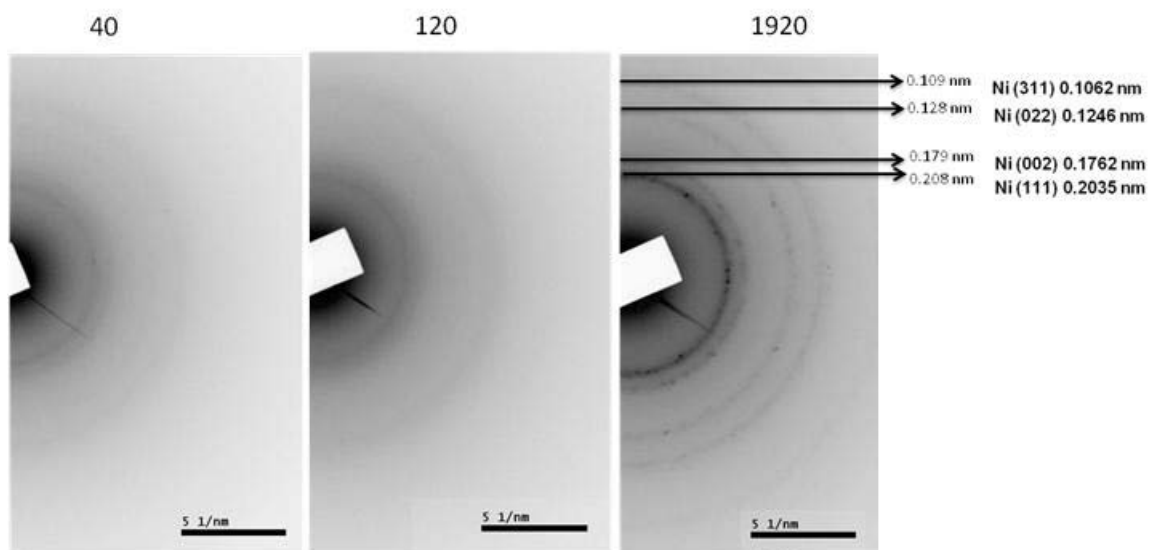

**Figure S3.** SAED analysis of PS/Pt/Ni composite particles with different PS:Ni weight ratio, 6:1 (a) 10:1 (b), 1:6 (c).
